# Supplementary material
Source: PubMed Central journal article supplement (PMC2661311)

Supporting information

Conformation and Membrane Position of the Region Linking the  
two C2 Domains in Synaptotagmin 1 by Site-Directed Spin  
Labeling

Hao Huang and David S. Cafiso

Department of Chemistry and Biophysics Program at the University of Virginia,  
Charlottesville, VA.

**Figure 1.** EPR spectra of single R1 substitutions in syt1C2AB recorded in solution in the absence (red) and presence (black) of  $\text{Ca}^{2+}$ . Spectra are 100 Gauss scans. Syt1C2AB concentration varied from 20-150  $\mu\text{M}$  in 20mM HEPES buffer (pH 7.4) containing 100mM NaCl with 1mM  $\text{Ca}^{2+}$  (black) or 5mM EDTA (red). The spectra indicate that the state of the linker connecting C2A and C2B in syt1C2AB is unchanged by  $\text{Ca}^{2+}$  binding.

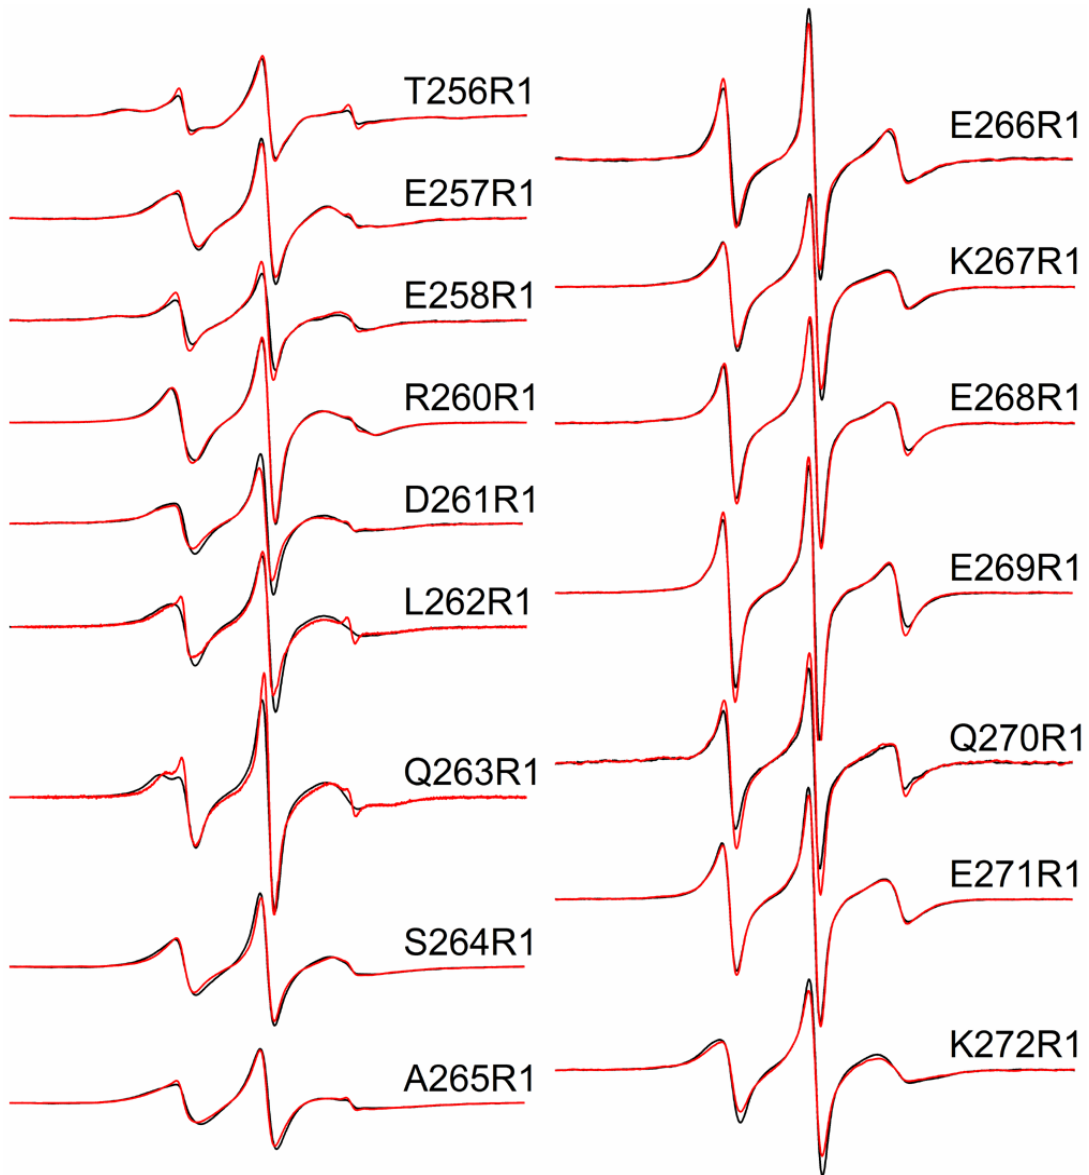

**Figure 2.** Comparison of EPR spectra of C2 domains on POPC/POPS (75:25) (black traces) and POPC/POPS/DOGS-NTA-Ni(II) (65:25:10) (red traces) vesicle bilayers. **(A)** mutants from syt1C2A. **(B)** mutants from syt1C2AB. The slight broadening in the central linewidth of L202R1 and I239R1 in syt1C2A and K267R1, E268R1 and E269R1 is consistent with the localization of these labels near the DOGS-NTA-Ni(II) layer.

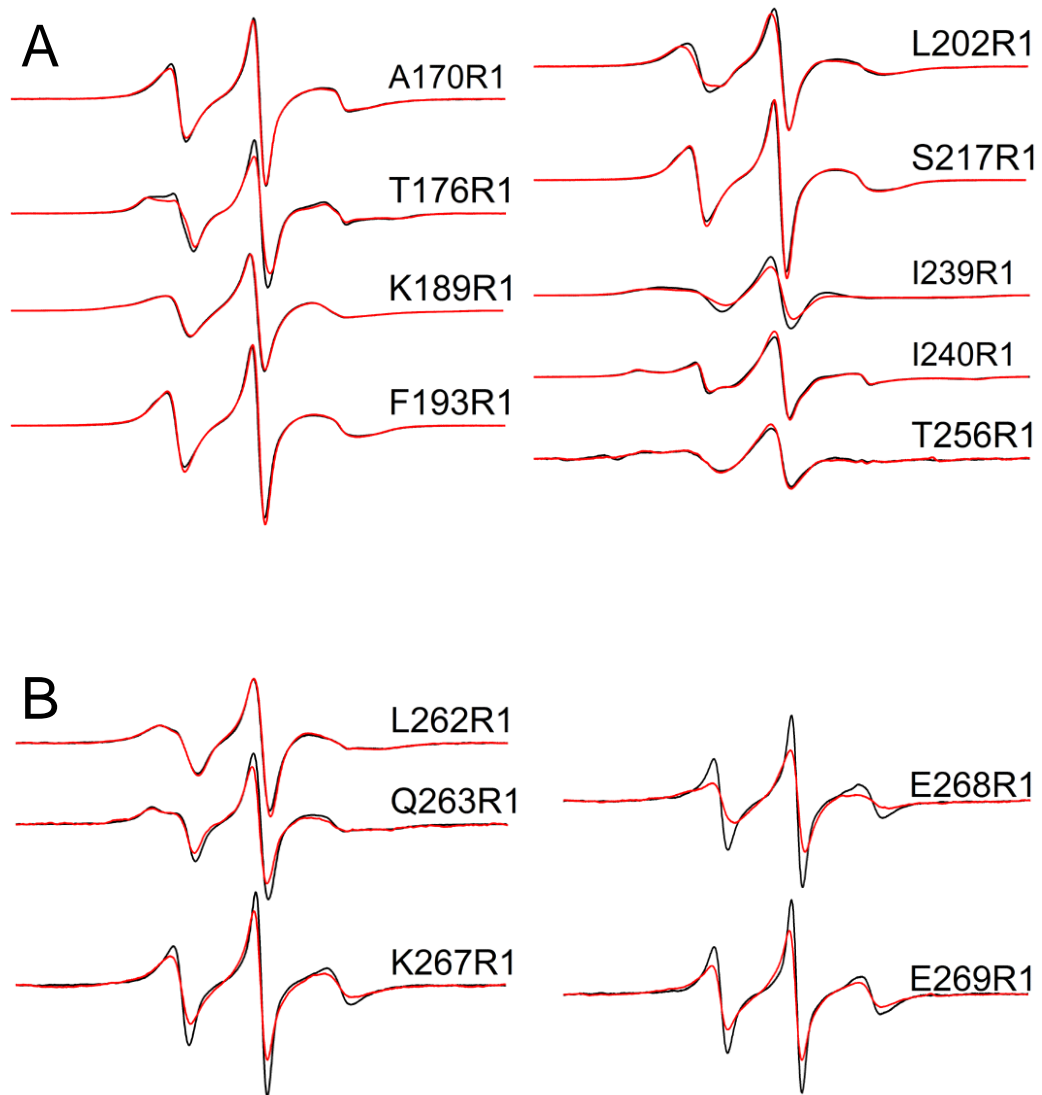

Supplement: NIHMS91122-supplement-1_si_001.pdf [file NIHMS91122-supplement-1_si_001.pdf]
